# Supplementary material
Source: PubMed Central journal article supplement (PMC9436987)
Supplement: 41598_2022_19045_MOESM1_ESM.pdf [file 41598_2022_19045_MOESM1_ESM.pdf]

# Deep Learning-based Patient Re-identification Is able to Exploit the Biometric Nature of Medical Chest X-ray Data

Kai Packhäuser<sup>1,\*</sup>, Sebastian Gündel<sup>1</sup>, Nicolas Münster<sup>1</sup>, Christopher Syben<sup>1</sup>, Vincent Christlein<sup>1</sup>, and Andreas Maier<sup>1</sup>

<sup>1</sup>Pattern Recognition Lab, Department of Computer Science, Friedrich-Alexander University Erlangen-Nürnberg, 91058 Erlangen, Germany

\*kai.packhaeuser@fau.de

## Supplementary Material

**Supplementary Table 1.** Additional patient verification results: Comparison of different data handling techniques (FTS and RNP), training set sizes  $N_s$  and learning rates  $\eta$ . We present the AUC (together with the lower and upper bounds of the 95 % confidence intervals from 10,000 bootstrap runs), the accuracy, the specificity, the recall, the precision, and the F1-score.

| Data handling | $N_s$   | $\eta$    | AUC + 95 % CI                                                  | Accuracy ( $\frac{TP+TN}{P+N}$ )                         | Specificity ( $\frac{TN}{N}$ )                          | Recall ( $\frac{TP}{P}$ )                               | Precision ( $\frac{TP}{TP+FP}$ )                        | F1-score                                                |        |
|---------------|---------|-----------|----------------------------------------------------------------|----------------------------------------------------------|---------------------------------------------------------|---------------------------------------------------------|---------------------------------------------------------|---------------------------------------------------------|--------|
| FTS           | 100,000 | $10^{-4}$ | 0.8509 $\begin{pmatrix} 0.8532 \\ 0.8485 \end{pmatrix}$        | 0.7461 $\begin{pmatrix} 74.605 \\ 100.000 \end{pmatrix}$ | 0.8414 $\begin{pmatrix} 42.071 \\ 50.000 \end{pmatrix}$ | 0.6507 $\begin{pmatrix} 32.534 \\ 50.000 \end{pmatrix}$ | 0.8040 $\begin{pmatrix} 32.534 \\ 40.463 \end{pmatrix}$ | 0.7193                                                  |        |
|               |         | $10^{-5}$ | 0.7429 $\begin{pmatrix} 0.7459 \\ 0.7399 \end{pmatrix}$        | 0.6322 $\begin{pmatrix} 63.223 \\ 100.000 \end{pmatrix}$ | 0.7924 $\begin{pmatrix} 39.619 \\ 50.000 \end{pmatrix}$ | 0.4721 $\begin{pmatrix} 23.604 \\ 50.000 \end{pmatrix}$ | 0.6945 $\begin{pmatrix} 23.604 \\ 33.985 \end{pmatrix}$ | 0.5621                                                  |        |
|               |         | $10^{-6}$ | 0.7257 $\begin{pmatrix} 0.7289 \\ 0.7225 \end{pmatrix}$        | 0.6702 $\begin{pmatrix} 67.020 \\ 100.000 \end{pmatrix}$ | 0.6719 $\begin{pmatrix} 33.594 \\ 50.000 \end{pmatrix}$ | 0.6685 $\begin{pmatrix} 33.426 \\ 50.000 \end{pmatrix}$ | 0.6708 $\begin{pmatrix} 33.426 \\ 49.832 \end{pmatrix}$ | 0.6696                                                  |        |
|               |         | $10^{-7}$ | 0.7440 $\begin{pmatrix} 0.7470 \\ 0.7409 \end{pmatrix}$        | 0.6741 $\begin{pmatrix} 67.410 \\ 100.000 \end{pmatrix}$ | 0.7002 $\begin{pmatrix} 35.008 \\ 50.000 \end{pmatrix}$ | 0.6480 $\begin{pmatrix} 32.402 \\ 50.000 \end{pmatrix}$ | 0.6837 $\begin{pmatrix} 32.402 \\ 47.394 \end{pmatrix}$ | 0.6654                                                  |        |
|               | 200,000 | $10^{-4}$ | 0.8886 $\begin{pmatrix} 0.8906 \\ 0.8866 \end{pmatrix}$        | 0.7920 $\begin{pmatrix} 79.203 \\ 100.000 \end{pmatrix}$ | 0.8547 $\begin{pmatrix} 42.736 \\ 50.000 \end{pmatrix}$ | 0.7293 $\begin{pmatrix} 36.467 \\ 50.000 \end{pmatrix}$ | 0.8339 $\begin{pmatrix} 36.467 \\ 43.731 \end{pmatrix}$ | 0.7761 $\begin{pmatrix} 24.713 \\ 31.844 \end{pmatrix}$ | 0.7781 |
|               |         | $10^{-5}$ | 0.8158 $\begin{pmatrix} 0.8185 \\ 0.8132 \end{pmatrix}$        | 0.6758 $\begin{pmatrix} 67.582 \\ 100.000 \end{pmatrix}$ | 0.8574 $\begin{pmatrix} 42.869 \\ 50.000 \end{pmatrix}$ | 0.4943 $\begin{pmatrix} 24.713 \\ 50.000 \end{pmatrix}$ | 0.7761 $\begin{pmatrix} 24.713 \\ 31.844 \end{pmatrix}$ | 0.6039                                                  |        |
|               |         | $10^{-6}$ | 0.7615 $\begin{pmatrix} 0.7645 \\ 0.7586 \end{pmatrix}$        | 0.6755 $\begin{pmatrix} 67.552 \\ 100.000 \end{pmatrix}$ | 0.7448 $\begin{pmatrix} 37.242 \\ 50.000 \end{pmatrix}$ | 0.6062 $\begin{pmatrix} 30.310 \\ 50.000 \end{pmatrix}$ | 0.7038 $\begin{pmatrix} 30.310 \\ 43.068 \end{pmatrix}$ | 0.6514                                                  |        |
|               |         | $10^{-7}$ | 0.7526 $\begin{pmatrix} 0.7556 \\ 0.7495 \end{pmatrix}$        | 0.6819 $\begin{pmatrix} 68.194 \\ 100.000 \end{pmatrix}$ | 0.6791 $\begin{pmatrix} 33.957 \\ 50.000 \end{pmatrix}$ | 0.6847 $\begin{pmatrix} 34.237 \\ 50.000 \end{pmatrix}$ | 0.6809 $\begin{pmatrix} 34.237 \\ 50.280 \end{pmatrix}$ | 0.6828                                                  |        |
|               | 400,000 | $10^{-3}$ | 0.9541 $\begin{pmatrix} 0.9552 \\ 0.9529 \end{pmatrix}$        | 0.8852 $\begin{pmatrix} 88.519 \\ 100.000 \end{pmatrix}$ | 0.8655 $\begin{pmatrix} 43.275 \\ 50.000 \end{pmatrix}$ | 0.9049 $\begin{pmatrix} 45.244 \\ 50.000 \end{pmatrix}$ | 0.8706 $\begin{pmatrix} 45.244 \\ 51.969 \end{pmatrix}$ | 0.8874                                                  |        |
|               |         | $10^{-5}$ | 0.8518 $\begin{pmatrix} 0.8542 \\ 0.8494 \end{pmatrix}$        | 0.7450 $\begin{pmatrix} 74.498 \\ 100.000 \end{pmatrix}$ | 0.8410 $\begin{pmatrix} 42.050 \\ 50.000 \end{pmatrix}$ | 0.6490 $\begin{pmatrix} 32.448 \\ 50.000 \end{pmatrix}$ | 0.8032 $\begin{pmatrix} 32.448 \\ 40.398 \end{pmatrix}$ | 0.7179                                                  |        |
|               |         | $10^{-6}$ | 0.7417 $\begin{pmatrix} 0.7449 \\ 0.7386 \end{pmatrix}$        | 0.6572 $\begin{pmatrix} 65.715 \\ 100.000 \end{pmatrix}$ | 0.7152 $\begin{pmatrix} 35.761 \\ 50.000 \end{pmatrix}$ | 0.5991 $\begin{pmatrix} 29.954 \\ 50.000 \end{pmatrix}$ | 0.6778 $\begin{pmatrix} 29.954 \\ 44.193 \end{pmatrix}$ | 0.6360                                                  |        |
|               |         | $10^{-7}$ | 0.7306 $\begin{pmatrix} 0.7337 \\ 0.7275 \end{pmatrix}$        | 0.6567 $\begin{pmatrix} 65.670 \\ 100.000 \end{pmatrix}$ | 0.6801 $\begin{pmatrix} 34.006 \\ 50.000 \end{pmatrix}$ | 0.6333 $\begin{pmatrix} 31.664 \\ 50.000 \end{pmatrix}$ | 0.6644 $\begin{pmatrix} 31.664 \\ 47.658 \end{pmatrix}$ | 0.6485                                                  |        |
| RNP           | 800,000 | $10^{-3}$ | 0.9826 $\begin{pmatrix} 0.9833 \\ 0.9820 \end{pmatrix}$        | 0.9324 $\begin{pmatrix} 93.238 \\ 100.000 \end{pmatrix}$ | 0.9393 $\begin{pmatrix} 46.966 \\ 50.000 \end{pmatrix}$ | 0.9254 $\begin{pmatrix} 46.272 \\ 50.000 \end{pmatrix}$ | 0.9385 $\begin{pmatrix} 46.272 \\ 49.306 \end{pmatrix}$ | 0.9319                                                  |        |
|               |         | $10^{-4}$ | <b>0.9940</b> $\begin{pmatrix} 0.9944 \\ 0.9937 \end{pmatrix}$ | 0.9555 $\begin{pmatrix} 95.545 \\ 100.000 \end{pmatrix}$ | 0.9822 $\begin{pmatrix} 49.111 \\ 50.000 \end{pmatrix}$ | 0.9287 $\begin{pmatrix} 46.434 \\ 50.000 \end{pmatrix}$ | 0.9812 $\begin{pmatrix} 46.434 \\ 47.323 \end{pmatrix}$ | 0.9542                                                  |        |
| FTS           | 800,000 | $10^{-5}$ | 0.9278 $\begin{pmatrix} 0.9294 \\ 0.9262 \end{pmatrix}$        | 0.8339 $\begin{pmatrix} 83.392 \\ 100.000 \end{pmatrix}$ | 0.8946 $\begin{pmatrix} 44.732 \\ 50.000 \end{pmatrix}$ | 0.7732 $\begin{pmatrix} 38.660 \\ 50.000 \end{pmatrix}$ | 0.8801 $\begin{pmatrix} 38.660 \\ 43.928 \end{pmatrix}$ | 0.8232                                                  |        |
|               |         | $10^{-5}$ | 0.9200 $\begin{pmatrix} 0.9217 \\ 0.9182 \end{pmatrix}$        | 0.8215 $\begin{pmatrix} 82.153 \\ 100.000 \end{pmatrix}$ | 0.8888 $\begin{pmatrix} 44.440 \\ 50.000 \end{pmatrix}$ | 0.7543 $\begin{pmatrix} 37.713 \\ 50.000 \end{pmatrix}$ | 0.8715 $\begin{pmatrix} 37.713 \\ 43.273 \end{pmatrix}$ | 0.8087                                                  |        |
|               |         | $10^{-6}$ | 0.8669 $\begin{pmatrix} 0.8692 \\ 0.8646 \end{pmatrix}$        | 0.7752 $\begin{pmatrix} 77.519 \\ 100.000 \end{pmatrix}$ | 0.8165 $\begin{pmatrix} 40.823 \\ 50.000 \end{pmatrix}$ | 0.7339 $\begin{pmatrix} 36.696 \\ 50.000 \end{pmatrix}$ | 0.7999 $\begin{pmatrix} 36.696 \\ 45.873 \end{pmatrix}$ | 0.7655                                                  |        |
|               |         | $10^{-7}$ | 0.8126 $\begin{pmatrix} 0.8152 \\ 0.8099 \end{pmatrix}$        | 0.7247 $\begin{pmatrix} 72.468 \\ 100.000 \end{pmatrix}$ | 0.7502 $\begin{pmatrix} 37.509 \\ 50.000 \end{pmatrix}$ | 0.6992 $\begin{pmatrix} 34.959 \\ 50.000 \end{pmatrix}$ | 0.7368 $\begin{pmatrix} 34.959 \\ 47.450 \end{pmatrix}$ | 0.7175                                                  |        |
